# Supplementary material for: Direct synthesis of imines from nitro compounds and biomass-derived carbonyl compounds over nitrogen-doped carbon material supported Ni nanoparticles
Source: Royal Society of Chemistry journal article supplement (doi:10.1039/d0nj05632d), 2021-01-01
Supplement: d0nj05632d1.pdf [file d0nj05632d1.pdf]

## **Supporting information**

### **Direct synthesis of imines from nitro compounds and biomass-derived carbonyl compounds over nitrogen-doped carbon materials supported Ni nanoparticles**

Bo Li, Yanxin Wang, Quan Chi\*, Ziliang Yuan, Bing Liu\*, and Zehui Zhang\*

Key Laboratory of Catalysis and Materials Sciences of Hubei, South-Central University for Nationalities, Wuhan, 430074, China.

\*Corresponding author: Tel.: +86-27-67842572. Fax: +86-27-67842572. Bing Liu: E-mail: liubing@mail.scuec.edu.cn; Quan Chi: E-mail: chiquanscuec@163.com

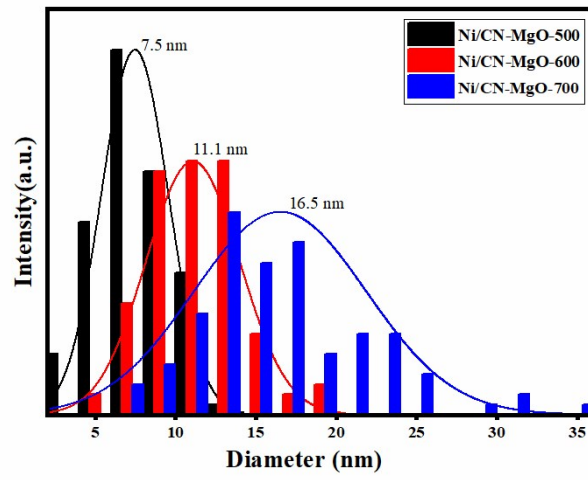

**Fig. S1** Particle size distributions for the Ni/CN-MgO-T

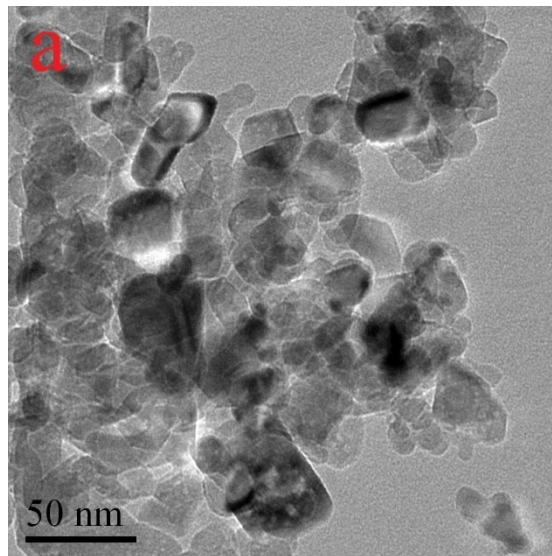

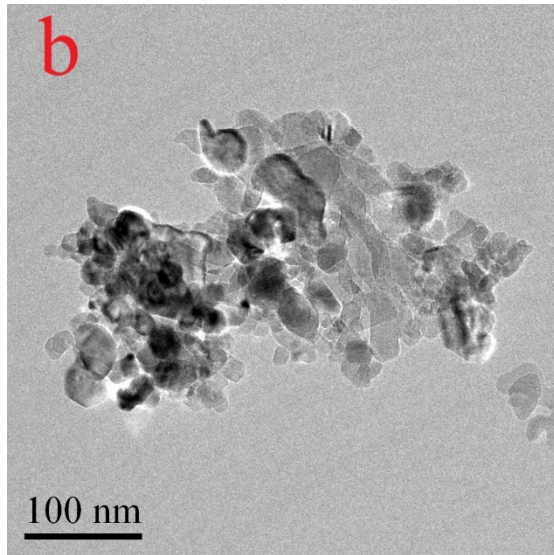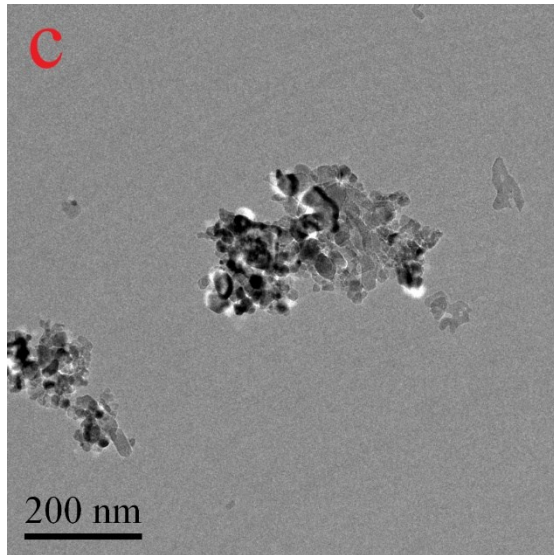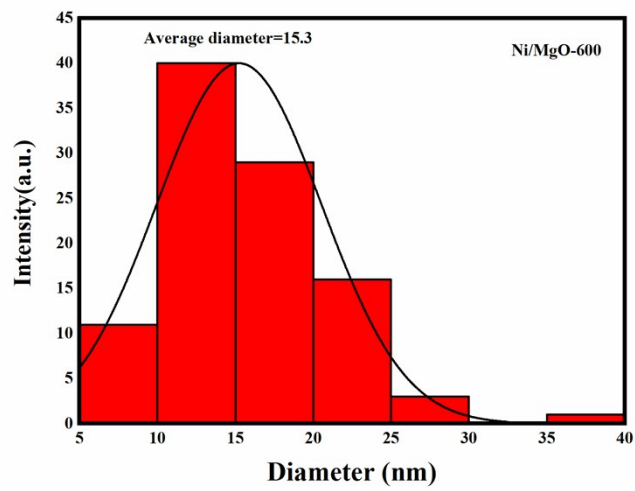

**Fig. S2** TEM(a,b,c) and Particle size distributions for the Ni/ MgO-600

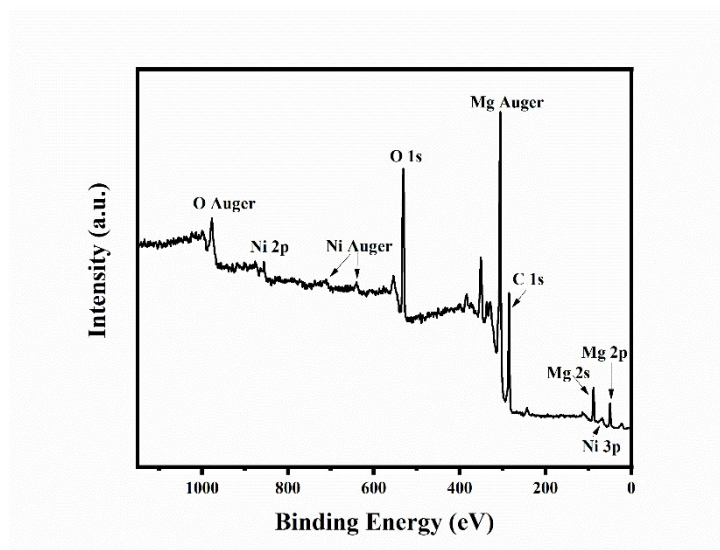

**Fig. S3** XPS survey scan of the Ni/CN-MgO-600 catalyst

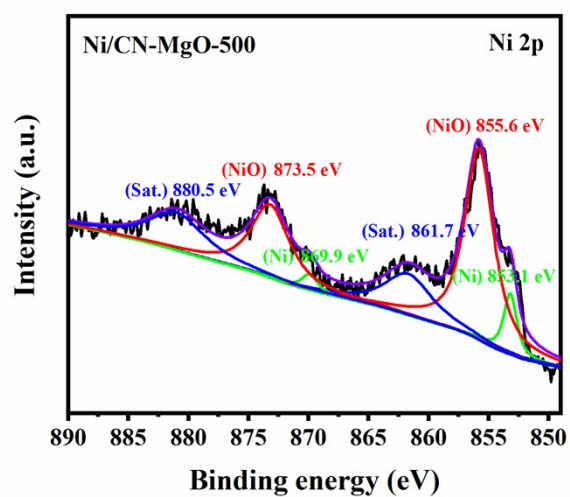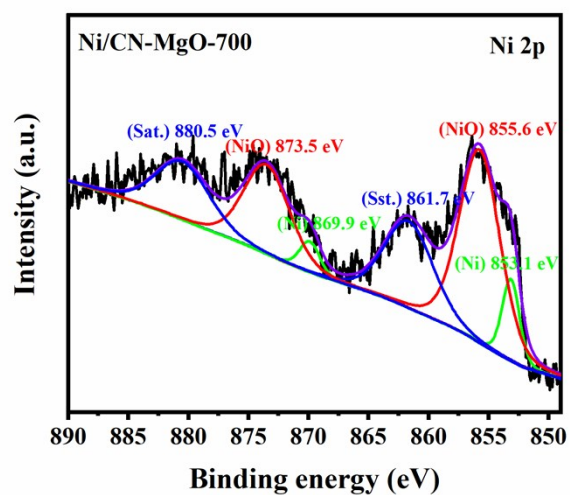

**Fig. S4** XPS spectra of Ni 2p in the Ni/NC-MgO-500 and Ni/CN-MgO-700 catalysts

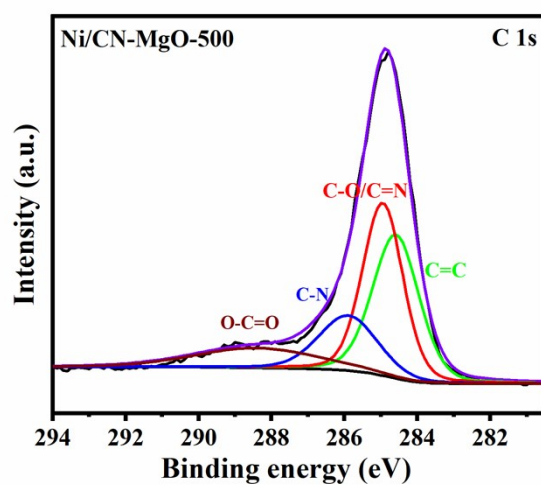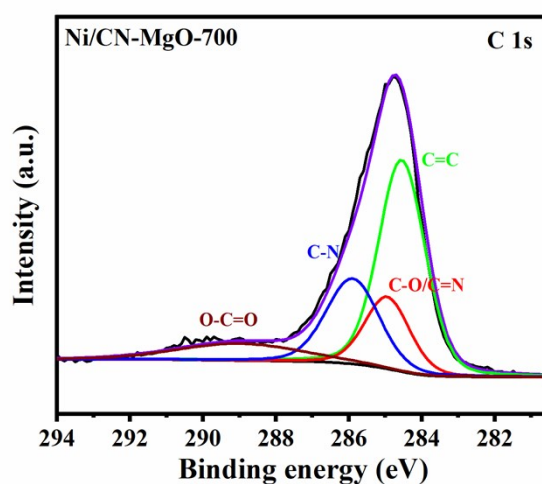

**Fig. S5** XPS spectra of C 1s in the Ni/NC-MgO-500 and Ni/CN-MgO-700 catalysts

**Table S1.** The percentage of different carbon in the Ni/CN-MgO-T catalysts.

| Entry | Samples       | O-C=O | C-N   | C-O/C=N | C=C   |
|-------|---------------|-------|-------|---------|-------|
| 1     | Ni/CN-MgO-500 | 12.7% | 16.7% | 36.0%   | 34.6% |
| 2     | Ni/CN-MgO-600 | 11.1% | 19.2% | 29.0%   | 40.7% |
| 3     | Ni/CN-MgO-700 | 10.7% | 22.8% | 16.4%   | 50.1% |

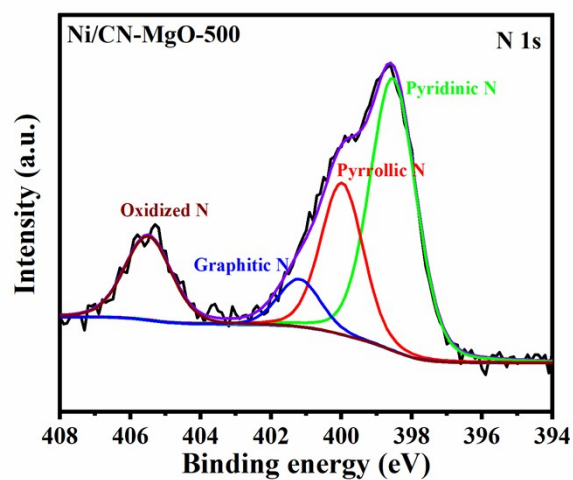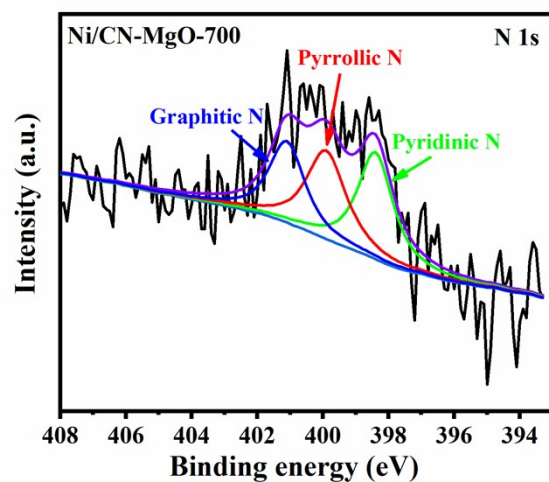

**Fig. S6** XPS spectra of N 1s in the Ni/NC-MgO-500 and Ni/CN-MgO-700 catalysts

**Table S2.** The percentage of different nitrogen in the Ni/CN-MgO-T catalysts

| Entry | Samples       | Pyridinic N | Pyrrolic N | Graphitic N | Oxidized N |
|-------|---------------|-------------|------------|-------------|------------|
| 1     | Ni/CN-MgO-500 | 50.4%       | 25.7%      | 8.2%        | 15.7%      |
| 2     | Ni/CN-MgO-600 | 49.6%       | 32.4%      | 18.0%       | -          |
| 3     | Ni/CN-MgO-700 | 32.2%       | 37.6%      | 30.2%       | -          |

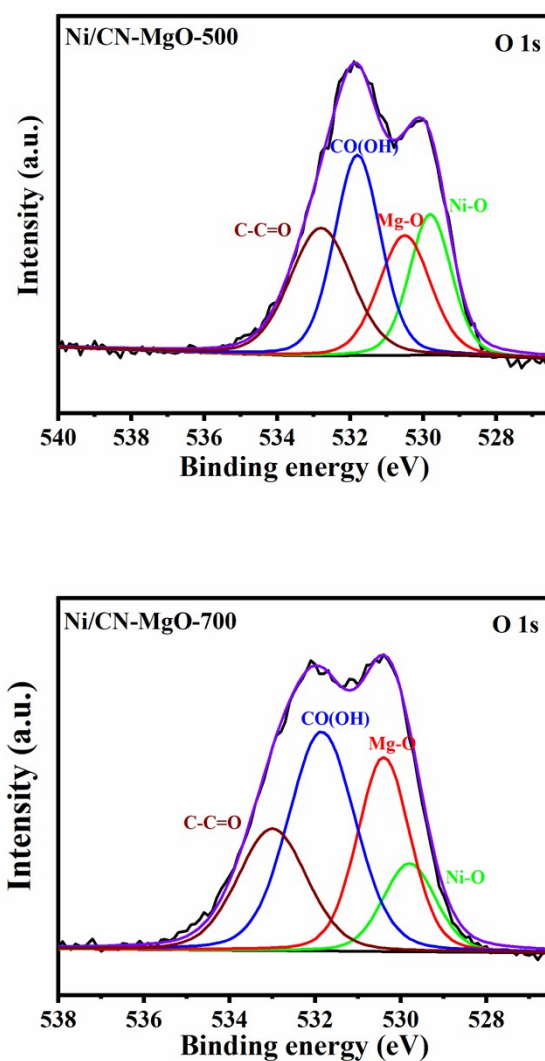

**Fig. S7** XPS spectra of O 1s in the Ni/NC-MgO-500 and Ni/CN-MgO-700 catalysts

**Table S3.** The percentage of different oxygen in the Ni/CN-MgO-T catalysts

| Entry | Samples       | Ni-O  | Mg-O  | CO(OH) | C-C=O |
|-------|---------------|-------|-------|--------|-------|
| 1     | Ni/CN-MgO-500 | 20.1% | 21.1% | 31.8%  | 27.0% |
| 2     | Ni/CN-MgO-600 | 16.6% | 22.8% | 35%    | 25.6% |
| 3     | Ni/CN-MgO-700 | 12.3% | 26.9% | 38.7%  | 22.1% |

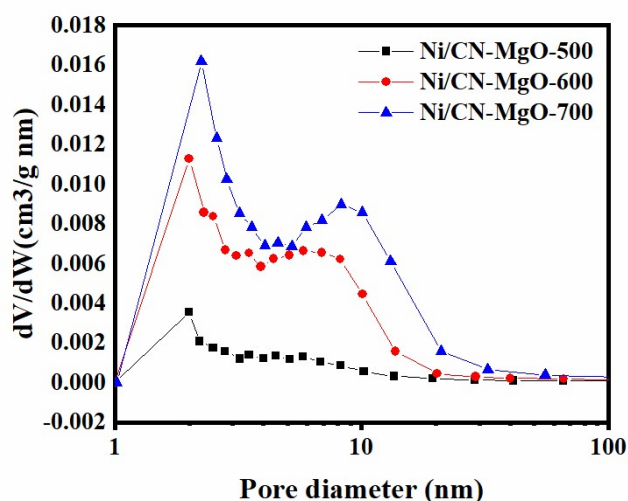

**Fig. S8** pore size distributions of the Ni/CN-MgO-T catalysts

**Table S4.** The texture properties of the as-prepared catalysts.

| Entry | Samples       | $S_{\text{BET}}$<br>( $\text{m}^2 \text{g}^{-1}$ ) | Pore Volume <sup>a</sup><br>( $\text{cm}^3 \text{g}^{-1}$ ) | Pore Size <sup>b</sup><br>(nm) |
|-------|---------------|----------------------------------------------------|-------------------------------------------------------------|--------------------------------|
| 1     | Ni/CN-MgO-500 | 35.5                                               | 0.039                                                       | 14.0                           |
| 2     | Ni/CN-MgO-600 | 181.0                                              | 0.107                                                       | 7.67                           |
| 3     | Ni/CN-MgO-700 | 171.2                                              | 0.214                                                       | 10.4                           |

**Table S5.** The comparison between other catalysts and our Ni/CN-MgO catalyst.

| Entry | Catalyst                                            | Condition                                                                      | Compared                                                                                                                                                                                            |
|-------|-----------------------------------------------------|--------------------------------------------------------------------------------|-----------------------------------------------------------------------------------------------------------------------------------------------------------------------------------------------------|
| 1     | Au/TiO <sub>2</sub> <sup>[1]</sup>                  | 25 °C, 1 mmol H <sub>2</sub> O, 5 atm CO                                       | The use of precious metals as precursors makes the catalyst expensive.                                                                                                                              |
| 2     | Au-Pd/Al <sub>2</sub> O <sub>3</sub> <sup>[2]</sup> | 140 °C, 2 MPa Ar, 40 mL methanol, 10 mL H <sub>2</sub> O, 0.5 g cat            | The use of precious metals to prepare the catalyst increases the cost of the catalyst. It is also a bimetallic catalyst. At the same time, the temperature condition of the reaction is also harsh. |
| 3     | CoOx@NC-800 <sup>[3]</sup>                          | 110 °C, 5.0 MPa H <sub>2</sub> , THF (3.2 mL), H <sub>2</sub> O (0.8 mL), 24 h | The reaction conditions are harsh such as temperature and pressure.                                                                                                                                 |
| 4     | CoS <sub>2</sub> @MoS <sub>2</sub> <sup>[4]</sup>   | 60 °C, 1.5 MPa H <sub>2</sub>                                                  | This reaction condition is indeed in compliance with environmental protection regulations, but its poor selectivity makes the                                                                       |



|   |                                             |                                            |                                                                                                                                |
|---|---------------------------------------------|--------------------------------------------|--------------------------------------------------------------------------------------------------------------------------------|
|   |                                             |                                            | separation work cost much.                                                                                                     |
| 5 | PtCo/CoBO <sub>x</sub> <sup>[5]</sup>       | 60 °C and 1 MPa H <sub>2</sub> , 5mg Cat   | The catalyst is prepared by using precious metals, and it is also a bimetallic catalyst, which is more complicated to prepare. |
| 6 | Ni <sub>2</sub> Si/SiCN-1000 <sup>[6]</sup> | 170 °C, 5 MPa H <sub>2</sub> , 100 mg cat  | The reaction conditions are very harsh such as reaction temperature and pressure.                                              |
| 7 | Ni/SiO <sub>2</sub> <sup>[7]</sup>          | 378 K, 1.4 MPa H <sub>2</sub> , 15 mg cat  | The preparation method of the catalyst is complicated.                                                                         |
| 8 | Ni/SiO <sub>2</sub> <sup>[8]</sup>          | 80 °C, 1.4 MPa H <sub>2</sub> , 5 mg cat   | The preparation method of the catalyst is complicated.                                                                         |
| 9 | Ni/CN-MgO-600                               | 80 °C, 1.0 MPa H <sub>2</sub> , 20 mg cat. | Simple preparation method, economical source of materials.                                                                     |

[1] J. Huang, L. Yu, L. He, Y. Liu, Y. Cao, K. Fan, *Green Chem.*, 2011, **13**, 2672-2677.

[2] Y. Xiang, Q. Meng, X. Li, J. Wang, *Chem. Commun.*, 2010, **46**, 5918–5920.

[3] T. Song, P. Ren, Y. Duan, Z. Wang, X. Chena, Y. Yang, *Green Chem.*, 2018, **20**, 4629-4637.

[4] W. Han, J. Wang, X. Lia, L. Zhou, Y. Yang, M. Tang, H. Ge, *Catal. Commun.*, 2019, **124**, 86-91.

[5] S. Zhang, Z. Xia, Y. Ma, J. Li, Y. Qu, *J. Catal.*, 2019, **374**, 72-81.

[6] X. Chen, S. Han, D. Yin, C. Liang, *Inorg. Chem. Front.*, 2020, **7**, 82-90.

[7] Y. Zheng, K. Ma, H. Li, J. Li, J. He, X. Sun, R. Li, J. Ma, *Catal. Lett.*, 2009, **128**, 465-474.

[8] B. Li, H. Zeng, *Chem. Mater.*, 2019, **31**, 5320-5330.
